# Supplementary material for: Reconsidering the Heritability of Intelligence in Adulthood: Taking Assortative Mating and Cultural Transmission into Account
Source: Springer Nature journal article supplement (doi:10.1007/s10519-011-9507-9), 2011-10-03
Supplement: MOESM2 [file 10519_2011_9507_MOESM2_ESM.doc]

**Supplement 2**: **Performance intelligence**

**Table S2.1** Model fitting results for performance intelligence within an extended twin-family design.

|  | Model | against | -2LL | df | par | cs | χ2 | Δdf | p | AIC | BIC (adj) | DIC |
| --- | --- | --- | --- | --- | --- | --- | --- | --- | --- | --- | --- | --- |
| S-1 | saturated model |  | 10550.80 | 1291 | 24 | 5 |  |  |  | 7968.82 | 3605.41 | 2744.39 |
| S-2 | equal DZ/sib corr. | S-1 | 10560.80 | 1297 | 18 | 5 | 10.00 | 6 | .125 | 7966.80 | 3602.64 | 2737.62 |
| SH-1 | full SH-model | S-2 | 10585.99 | 1303 | 11 | 4 | 25.19 | 6 | .000 | 7979.99 | 3607.47 | 2738.45 |
| PA-1 | full PA-model | S-2 | 10583.18 | 1303 | 11 | 4 | 22.38 | 6 | .001 | 7977.18 | 3606.07 | 2737.05 |
| **SH-2** | **no C** | **SH-1** | **10588.45** | **1304** | **10** | **4** | **2.46** | **1** | **.117** | **7980.45** | **3607.41** | **2737.72** |
| SH-3 | no C - CT/rGE* | SH-2 | 10600.14 | 1305 | 9 | 4 | 11.70 | 1 | .001 | 7988.14 | 3610.67 | 2739.64 |
| SH-4 | no C - rGE/A/D | SH-2 | 10673.34 | 1306 | 8 | 4 | 84.90 | 2 | .000 | 8059.34 | 3645.98 | 2774.28 |
| SH-5 | no C - D | SH-2 | 10605.97 | 1305 | 9 | 4 | 17.52 | 1 | .000 | 7995.97 | 3614.88 | 2744.52 |
| SH-6 | no C - ASM | SH-2 | 10604.12 | 1305 | 9 | 4 | 15.67 | 1 | .000 | 7994.12 | 3613.95 | 2743.59 |
| PA-2 | no C | PA-1 | 10583.99 | 1304 | 10 | 4 | .81 | 1 | .368 | 7975.99 | 3605.18 | 2735.49 |
| **PA-3** | **no C-CT/rGE*** | **PA-2** | **10584.12** | **1305** | **9** | **4** | **.13** | **1** | **.718** | **7972.12** | **3602.66** | **2731.63** |
| PA-4 | no C/CT/rGE - A/D | PA-3 | 10798.37 | 1307 | 7 | 4 | 214.25 | 3 | .000 | 8182.37 | 3707.20 | 2834.84 |
| PA-5 | no C/CT/rGE - D | PA-3 | 10600.59 | 1306 | 8 | 4 | 16.46 | 2 | .000 | 7986.59 | 3609.60 | 2737.90 |
| PA-6 | no C/CT/rGE - ASM | PA-3 | 10604.13 | 1306 | 8 | 4 | 20.01 | 2 | .000 | 7990.13 | 3611.37 | 2739.67 |
| **PA-7** | **no C/D** | **PA-2** | **10584.66** | **1305** | **9** | **4** | **.67** | **1** | **.413** | **7974.66** | **3604.22** | **2733.86** |
| PA-8 | no C/D - CT/rGE | PA-7 | 10600.59 | 1306 | 8 | 4 | 15.92 | 1 | .000 | 7986.59 | 3609.60 | 2737.90 |
| PA-9 | no C/D - A/rGE | PA-7 | 10673.34 | 1306 | 8 | 4 | 88.68 | 1 | .000 | 8059.34 | 3645.98 | 2774.28 |
| PA-10 | no C/D - ASM | PA-7 | 10606.60 | 1306 | 8 | 4 | 21.94 | 1 | .000 | 7994.60 | 3613.90 | 2742.87 |

*Notes: S=saturated; SH=social homogamy; PA=phenotypic assortment; -2LL=minus 2 log likelihood; par=number of estimated parameters; cs=number of constraints; χ2=Chi square (difference in -2LL); p=p-value; AIC=Akaike's Information Criterion; BIC(adj)=Sample Size Adjusted Bayesian Information Criterion; DIC=Deviance Information Criterion; ASM = variance explained by assortative mating, ASM is PA under the PA model and SH under the SH model; preferred models are printed in bold font; * rGE refers to the correlation between A and CT, if either A or CT are eliminated from the model, rGE will be estimated at zero as well. ** if A is dropped from the model, D has to be fixed to zero and rGE will be estimated at zero. Models in which the effects of D are estimated but the effects of A are fixed to zero are biologically implausible (Falconer & Mackay, 1989).*

**Figure S2.1** Standardized variance components for performance intelligence based on full (left) and reduced (right) social homogamy (SH) and phenotypic assortment (PA) models.

|  |  |
| --- | --- |

Notes: PA = phenotypic assortment; SH = social homogamy; ASM = assortative mating (phenotypic assortment under the PA model; social homogamy under the SH model); A = additive genetic factors; D = genetic dominance; E = non-shared environmental factors; C = shared environmental factors; CT = cultural transmission; rGE = correlation between A and CT; Under the PA model, rGE is negative since the unstandardized parameter estimate of CT is negative; model numbering correspond to model numbering in Table S2.1.
